# Supplementary material
Source: PubMed Central journal article supplement (PMC2553286)
Supplement: JCI0832460.sd.pdf [file JCI0832460.sd.pdf]

## Supplementary Table 1.

### Peptide matrix systems

Peptide matrix system 1 contains overlapping peptides spanning the H5N1 internal proteins and the H3N2 HA and NA.

Peptide matrix system 2 contains overlapping peptides spanning the H3N2 internal proteins with amino acid sequences different from the corresponding regions of the H5N1 internal proteins.

Peptide matrix system 3 contains overlapping peptides spanning the H5N1 HA and NA.

In summary, 1102 overlapping peptides arranged in Peptide matrix systems 1-3 covered the full proteome of the H5N1 and H3N2.

| Peptide matrix system 1 <sup>A</sup> |                 |                                                           |                                | Peptide matrix system 2 <sup>B</sup> |                |                                                           |                                |
|--------------------------------------|-----------------|-----------------------------------------------------------|--------------------------------|--------------------------------------|----------------|-----------------------------------------------------------|--------------------------------|
|                                      | Peptide Pools   | Source Protein                                            | Amino Acid Number <sup>D</sup> |                                      | Peptide Pools  | Source Protein                                            | Amino Acid Number <sup>D</sup> |
| 1st Dimension                        | 1               | H3N2 HA                                                   | 1-208                          | 1st Dimension                        | 1              | H3N2 M1                                                   | 1-213                          |
|                                      | 2               |                                                           | 198-390                        |                                      | 2 <sup>E</sup> | H3N2 M1,M2                                                | 204-250,1-97                   |
|                                      | 3               |                                                           | 381-566                        |                                      |                | 3                                                         | H3N2 NP                        |
|                                      | 4               | H3N2 NA                                                   | 1-168                          |                                      | 4              |                                                           | 185-366                        |
|                                      | 5               |                                                           | 159-328                        |                                      | 5              |                                                           | 356-498                        |
|                                      | 6               |                                                           | 319-469                        |                                      | 6              | H3N2 NS1                                                  | 6-119                          |
|                                      | 7               | H5N1 PB1                                                  | 1-195                          |                                      | 7              |                                                           | 110-230                        |
|                                      | 8               |                                                           | 185-380                        |                                      | 8              | H3N2 NS2                                                  | 6-121                          |
|                                      | 9               |                                                           | 371-563                        |                                      | 9              | H3N2 PA                                                   | 1-192                          |
|                                      | 10              |                                                           | 554-750                        |                                      | 10             |                                                           | 183-326                        |
|                                      | 11              | H5N1 PB2                                                  | 1-198                          |                                      | 11             |                                                           | 317-443                        |
|                                      | 12              |                                                           | 189-384                        |                                      | 12             |                                                           | 434-716                        |
|                                      | 13              |                                                           | 375-577                        |                                      | 13             | H3N2 PB1                                                  | 1-396                          |
|                                      | 14              |                                                           | 568-759                        |                                      | 14             |                                                           | 417-753                        |
|                                      | 15 <sup>E</sup> | H5N1 M1,M2                                                | 1-132,1-57                     |                                      | 15             | H3N2 PB2                                                  | 1-151                          |
|                                      | 16 <sup>E</sup> |                                                           | 123-252,49-97                  |                                      | 16             |                                                           | 142-368                        |
|                                      | 17              | H5N1 NP                                                   | 1-179                          |                                      | 17             |                                                           | 359-570                        |
|                                      | 18              |                                                           | 170-346                        |                                      | 18             |                                                           | 561-759                        |
|                                      | 19              |                                                           | 337-497                        |                                      | 19             |                                                           | - <sup>F</sup>                 |
|                                      | 20              | H5N1 NS1,NS2                                              | 1-123,1-58                     | 20-38                                | 2nd Dimension  | All peptides above arranged non-sequentially <sup>G</sup> |                                |
|                                      | 21              |                                                           | 117-230,50-121                 |                                      |                |                                                           |                                |
|                                      | 22              | H5N1 PA                                                   | 1-201                          |                                      |                |                                                           |                                |
|                                      | 23              |                                                           | 192-370                        |                                      |                |                                                           |                                |
|                                      | 24              |                                                           | 361-551                        |                                      |                |                                                           |                                |
|                                      | 25              |                                                           | 542-707                        |                                      |                |                                                           |                                |
| 26                                   |                 | - <sup>F</sup>                                            |                                |                                      |                |                                                           |                                |
| 2nd Dimension                        | 27-52           | All peptides above arranged non-sequentially <sup>G</sup> |                                |                                      |                |                                                           |                                |
| 3rd Dimension                        | 53-78           | All peptides above arranged non-sequentially <sup>G</sup> |                                |                                      |                |                                                           |                                |

| Peptide matrix system 3 <sup>C</sup> |               |                                                             |                                |
|--------------------------------------|---------------|-------------------------------------------------------------|--------------------------------|
|                                      | Peptide Pools | Source Protein                                              | Amino Acid Number <sup>D</sup> |
| 1st Dimension                        | 1             | H5N1 HA                                                     | 1-89                           |
|                                      | 2             |                                                             | 80-164                         |
|                                      | 3             |                                                             | 155-242                        |
|                                      | 4             |                                                             | 233-323                        |
|                                      | 5             |                                                             | 314-405                        |
|                                      | 6             |                                                             | 396-487                        |
|                                      | 7             |                                                             | 478-565                        |
|                                      | 8             | H5N1 NA                                                     | 1-104                          |
|                                      | 9             |                                                             | 95-176                         |
|                                      | 10            |                                                             | 167-249                        |
|                                      | 11            |                                                             | 240-320                        |
|                                      | 12            |                                                             | 309-393                        |
|                                      | 13            |                                                             | 384-477                        |
| 2nd Dimension                        | 14-24         | All peptides above arranged non-sequentially - <sup>F</sup> |                                |
|                                      | 25-26         |                                                             |                                |

<sup>A</sup> Peptide matrix system 1 consisted of 3 sets (or “Dimensions”) of 26 peptide pools.

<sup>B</sup> Peptide matrix system 2 consisted of 2 sets (or “Dimensions”) of 19 peptide pools.

<sup>C</sup> Peptide matrix system 3 consisted of 2 sets (or “Dimensions”) of 13 peptide pools.

<sup>D</sup> Protein region covered by the corresponding overlapping peptides.

<sup>E</sup> Protein region covered by the corresponding overlapping peptides.

<sup>F</sup> The peptide pools 15-16 of the Peptide matrix system 1 and the peptide pool 2 of the Peptide matrix system 2 contained a mixture of overlapping peptides of the M1 and M2. However, the responses detected against these pools were determined to be predominantly targeted to the M1 when the pool responses were confirmed at the single peptide level.

<sup>G</sup> The optimal peptide arrangement for the 2<sup>nd</sup> and 3<sup>rd</sup> dimensions of the Peptide matrix system 1 was determined by a series of software (“Deconvolute-This” (1)) simulations with a goal to minimize the number of subsequent assays required to determine individual peptides containing T-cell epitopes.

1. Roederer, M., and Koup, R.A. 2003. Optimized determination of T cell epitope responses. *Journal of Immunological Methods* 274:221-228.

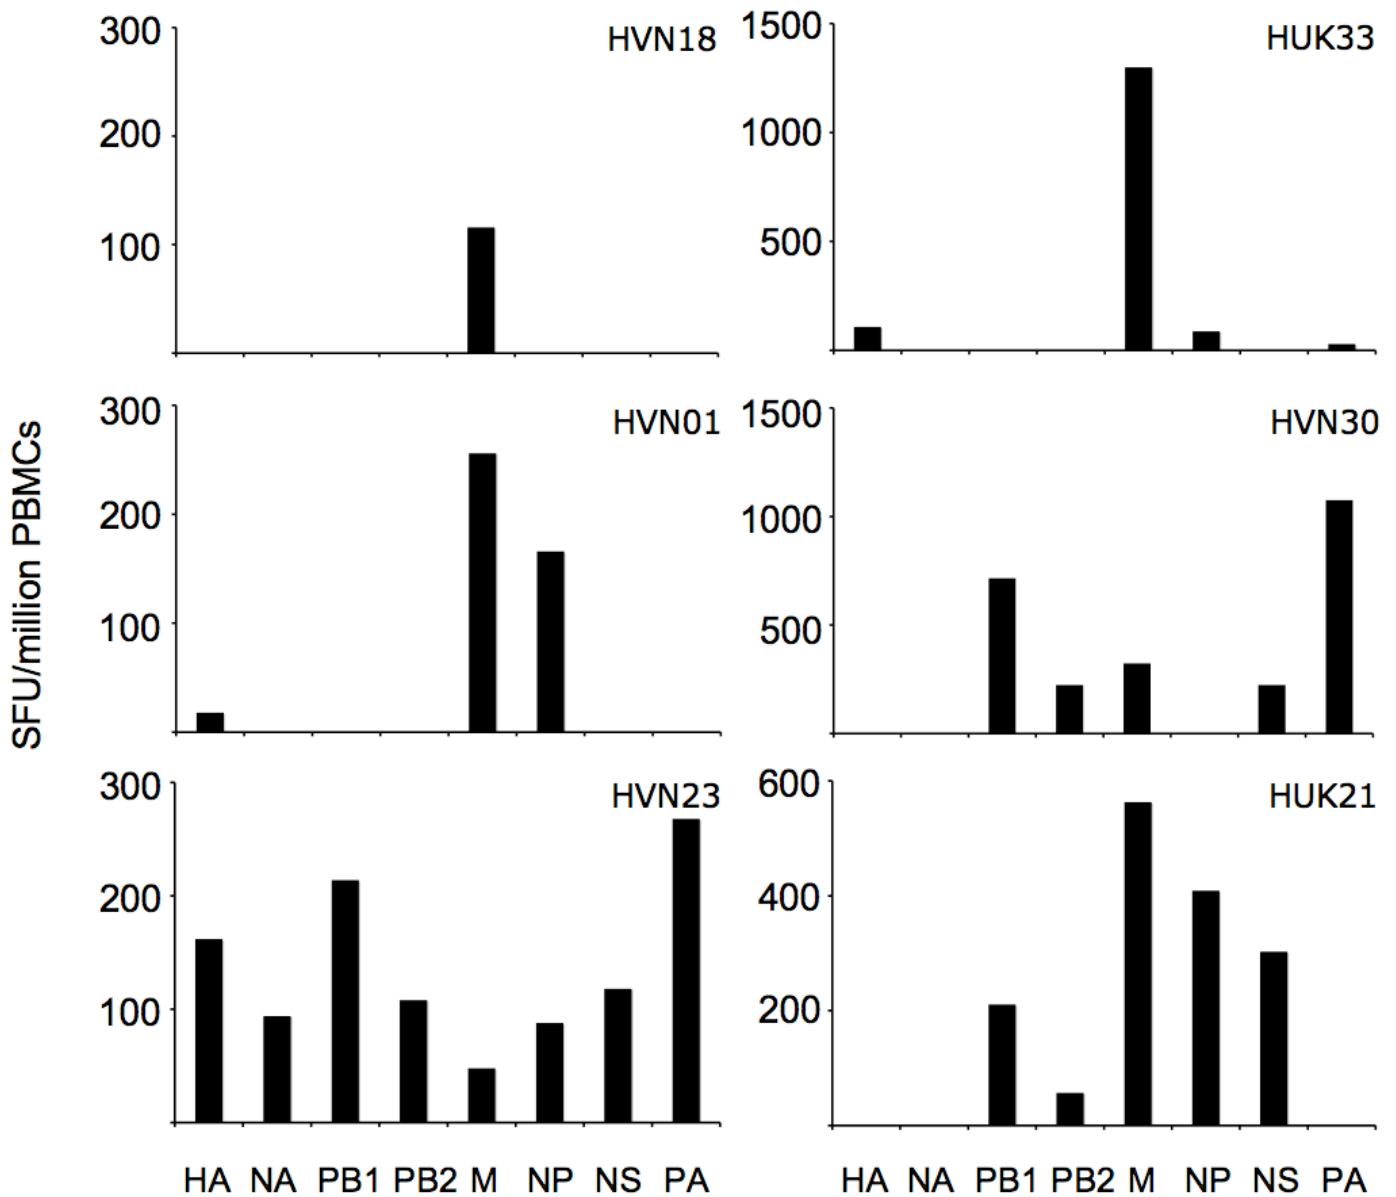

**Supplementary Figure 1.**

**Examples of various influenza specific memory T-cell recognition patterns.**

Considerable variation in the breadth and magnitude of the T-cell recognition was observed between different individuals. Examples of various T-cell response patterns against the overlapping peptides spanning the H3N2 full proteome and the H5N1 internal proteins are provided.

## Supplementary Table 2

### Peptides containing CD4+ and CD8+T-cell epitope regions across the full proteome of the H3N2 influenza A virus and the internal proteins of the H5N1 influenza A virus.

Positive responses detected during the peptide pool screening of the UK volunteers were subsequently confirmed at the single peptide level in a second round of *ex vivo* ELISpot assays.

We confirmed 136 peptides containing influenza A specific T-cell epitopes across the full proteome of the H3N2 strain and the internal proteins of the H5N1 strain. Previously identified epitope regions are highlighted in bold.

| Source Protein | Amino Acid Number | Sequence <sup>A</sup>             |                                | H5N1 Cross <sup>B</sup> | CD4/CD8 <sup>C</sup> | Recognition Frequency <sup>D</sup> | Ref <sup>E</sup> |
|----------------|-------------------|-----------------------------------|--------------------------------|-------------------------|----------------------|------------------------------------|------------------|
|                |                   | H3N2                              | H5N1                           | Recognition             | Dependency           |                                    |                  |
|                |                   |                                   |                                |                         |                      |                                    |                  |
| HA             | 48-67             | <u>DQIEVTNATELVQSSSTGGI</u>       | <u>EQVDTIMEKNVTVTHA</u>        | -                       | .                    | 1                                  |                  |
|                | 181-198           | <u>NVTMPNNEKFDKLYIWGV</u>         | <u>IKRSYNNTNQEDLLVMW</u>       | -                       | .                    | 1                                  |                  |
|                | 233-250           | <u>IGSRPRVRDIPSRISIW</u>          | <u>VPRIATRISKVNGQSGRM</u>      | -                       | .                    | 1                                  |                  |
|                | 241-258           | <u>DIPSRISIWTVKPGDI</u>           | <u>RMEFFWTILKPNDAINF</u>       | -                       | CD4                  | 1                                  |                  |
|                | 249-267           | <b><u>YWTIVKPGDILLINSTGNL</u></b> | <u>RMEFFWTILKPNDAINF</u>       | -                       | CD4                  | 1                                  | (1)              |
|                | 324-339           | <b><u>YVKQNTLKLATGMRNV</u></b>    | <u>YVKS NRLVLATGLRNSPQR</u>    | -                       | CD4                  | 1                                  | (1)              |
|                | 338-355           | <u>NVPEKQTRGIFGAIAGFI</u>         | <u>KKRGLFGAIAGFIEGGW</u>       | -                       | CD4                  | 1                                  |                  |
|                | 338-355           | <u>NVPEKQTRGIFGAIAGFI</u>         | <u>KKRGLFGAIAGFIEGGW</u>       | +                       | CD4                  | 2                                  |                  |
|                | 346-363           | <b><u>GIFGAIAGFIENGWEGMV</u></b>  | <u>KKRGLFGAIAGFIEGGW</u>       | -                       | CD4                  | 2                                  | (1)              |
|                | 346-363           | <b><u>GIFGAIAGFIENGWEGMV</u></b>  | <u>KKRGLFGAIAGFIEGGW</u>       | +                       | CD4                  | 2                                  | (1)              |
|                | 416-433           | <b><u>SEVEGRIQDLEKYVEDTK</u></b>  | <u>NNLEERRIENLNKKMEDGF</u>     | -                       | CD4                  | 1                                  | (1)              |
|                | 402-418           | <u>GKTNEKFHQIEKEFSEV</u>          | <u>DKMNTQFEAVGREFNNL</u>       | -                       | .                    | 2                                  |                  |
| NA             | 259-275           | <u>EGKIVHTSTLSGSAQHV</u>          | <u>KIFKMEKGVVKSVELDA</u>       | -                       | .                    | 1                                  |                  |
|                | 308-322           | <u>KDYSIVSSYVCSGLV</u>            | <u>NQLEYQIGYICSGVF</u>         | -                       | .                    | 1                                  |                  |
|                | 319-336           | <u>SGLVGDTPRKNDS SSSH</u>         | <u>CSGVFGDNPRPNDGTGSC</u>      | -                       | CD4                  | 1                                  |                  |
|                | 394-410           | <u>RQVIVERGNRSGYSGIF</u>          | <u>IVAITDWSGYSGSFVQH</u>       | -                       | .                    | 2                                  |                  |
| M1             | 1-15              | <u>MSLLTEVETVLSIV</u>             | <u>MSLLTEVETVLSII</u>          | +                       | CD8                  | 1                                  |                  |
|                | 6-22              | <u>EVETVLSIVPSGPLKA</u>           | <b><u>EVETVLSIIPSGPLKA</u></b> | -                       | .                    | 1                                  | (2)              |
|                | 19-35             | <b><u>PLKAEIAQRLEDVFAGK</u></b>   | <u>PLKAEIAQKLEDVFAGK</u>       | -                       | .                    | 1                                  | (3)              |

|           |         |                      |                          |   |     |   |        |
|-----------|---------|----------------------|--------------------------|---|-----|---|--------|
|           | 33-49   | AGKNTDLEALMEWLKTR    | <i>identical to H3N2</i> | + | CD8 | 1 |        |
|           | 40-57   | EALMEWLKTRPILSPLTK   | <i>identical to H3N2</i> | + | CD8 | 9 |        |
|           | 55-72   | LTKGILGFVFTLTVPSER   | <i>identical to H3N2</i> | + | CD4 | 1 | (4)    |
|           | 55-72   | LTKGILGFVFTLTVPSER   | <i>identical to H3N2</i> | + | CD8 | 2 | (5)    |
|           | 63-80   | VFTLTVPSERGLQRRRFV   | <i>identical to H3N2</i> | + | CD4 | 1 | (6)    |
|           | 71-88   | ERGLQRRRFVQNALNGNG   | <i>identical to H3N2</i> | + | CD4 | 2 | (6)    |
|           | 87-104  | NGDPNNMDKAVKLYRKLK   | NGDPNNMDRAVKLYKCLK       | + | CD4 | 1 |        |
|           | 95-112  | KAVKLYRKLKREITFHGA   | RAVKLYKCLKREITFHGA       | + | CD4 | 1 | (6)    |
|           | 95-112  | KAVKLYRKLKREITFHGA   | RAVKLYKCLKREITFHGA       | - | CD4 | 5 | (6)    |
|           | 95-112  | KAVKLYRKLKREITFHGA   | RAVKLYKCLKREITFHGA       | + | CD8 | 1 |        |
|           | 103-119 | LKREITFHGAKEIALSY    | LKREITFHGAKEVALSY        | + | CD4 | 2 | (6)    |
|           | 103-119 | LKREITFHGAKEIALSY    | LKREITFHGAKEVALSY        | - | CD4 | 3 |        |
|           | 110-125 | HGAKEIALSYSAGALA     | HGAKEVALSYSTGALA         | + | .   | 1 |        |
|           | 110-125 | HGAKEIALSYSAGALA     | HGAKEVALSYSTGALA         | - | .   | 1 |        |
|           | 116-132 | ALSYSAGALASCMGLIY    | ALSYSTGALASCMGLIY        | - | CD8 | 1 | (7)    |
|           | 123-138 | ALASCMGLIYNRMGAV     | ALASCMGLIYNRMGTV         | - | .   | 1 | (7)    |
|           | 137-154 | AVTTEVAFGLVCATCEQI   | TVTTEVAFGLVCATCEQI       | - | .   | 1 |        |
|           | 152-168 | EQIADSQHRSHRQMVAT    | EQIADSQHRSHRQMATI        | + | .   | 1 |        |
|           | 166-182 | VATTNPLIKHENRMVLA    | ATITNPLIRHENRMVLA        | + | .   | 3 |        |
|           | 173-189 | IKHENRMVLASTTAKAM    | IRHENRMVLASTTAKAM        | - | CD4 | 3 | (2)    |
|           | 173-189 | IKHENRMVLASTTAKAM    | IRHENRMVLASTTAKAM        | + | CD4 | 4 | (2, 6) |
|           | 180-199 | VLASTTAKAMEQMAGSSEQA | <i>identical to H3N2</i> | + | CD4 | 1 |        |
|           | 190-206 | EQMAGSSEQAAEAMEIA    | <i>identical to H3N2</i> | + | .   | 1 |        |
|           | 197-213 | EQAEEAMEIASQARRMV    | EQAEEAMEIANQARQMV        | + | CD4 | 1 | (6)    |
|           | 204-219 | EIASQARRMVQAMRAV     | EIANQARQMVQAMRTI         | + | CD4 | 3 | (6)    |
|           | 210-227 | RRMVQAMRAVGTHTPSSST  | ROMVQAMRTIGTHPNSSA       | + | CD4 | 3 | (6)    |
|           | 225-242 | SSTGLRDDLLENLQTYQK   | SSAGLRDNLLENLQAYQK       | - | .   | 1 |        |
|           | 233-250 | LLENLQTYQKRMGVQMQR   | LLENLQAYQKRMGVQMQR       | - | CD4 | 2 | (8)    |
|           | 241-252 | QKRMGVQMQRFK         | <i>identical to H3N2</i> | + | CD8 | 3 | (8)    |
| <b>M2</b> | 7-21    | VETPIRNEWGCRCND      | VETPTRNEWECRCSD          | - | .   | 1 | (9)    |
|           | 13-29   | NEWGCRCNDSSDPLVVA    | NEWECRCSDSSDPIVVA        | - | .   | 1 |        |
|           | 63-77   | PSTEGVPESMREEYR      | PATAGVPESMREEYR          | + | .   | 1 |        |
|           | 69-84   | PESMREEYRKEQQNAV     | PESMREEYRQEQQSAV         | + | CD8 | 1 |        |
| <b>NP</b> | 1-19    | MASQGTKRSYEQMETDGDR  | MASQGTKRSYEQMETGGER      | - | .   | 3 |        |
|           | 18-33   | DRQNATEIRASVGKMI     | ERQNATEIRASVGRMV         | + | CD4 | 2 |        |

|         |                                                                                                           |                                                                                                           |   |     |   |         |
|---------|-----------------------------------------------------------------------------------------------------------|-----------------------------------------------------------------------------------------------------------|---|-----|---|---------|
| 24-41   | EIRASVGM <u>M</u> IDGIGRFYI                                                                               | EIRASVGR <u>M</u> VSGIGRFYI                                                                               | - | CD4 | 1 |         |
| 24-41   | EIRASVGM <u>M</u> IDGIGRFYI                                                                               | EIRASVGR <u>M</u> VSGIGRFYI                                                                               | + | CD4 | 1 |         |
| 32-49   | <u>M</u> IDGIGRFYIQMCTELKL                                                                                | <u>M</u> VSGIGRFYIQMCTELKL                                                                                | + | CD8 | 1 |         |
| 32-49   | <u>M</u> IDGIGRFYIQMCTELKL                                                                                | <u>M</u> VSGIGRFYIQMCTELKL                                                                                | - | .   | 2 |         |
| 40-57   | YIQMCTELKLS <u>D</u> HEGRLI                                                                               | YIQMCTELKLS <u>D</u> YEGRLI                                                                               | + | CD8 | 3 | (10)    |
| 56-71   | LIQNSL <u>T</u> IEK <u>M</u> VLSAF                                                                        | LIQNSI <u>T</u> IER <u>M</u> VLSAF                                                                        | + | .   | 1 |         |
| 62-79   | TIEK <u>M</u> VLSAFDERRN <u>K</u> YL                                                                      | TIER <u>M</u> VLSAFDERRN <u>R</u> YL                                                                      | - | .   | 1 |         |
| 70-87   | AFDERRN <u>K</u> YLEEHPSAGK                                                                               | AFDERRN <u>R</u> YLEEHPSAGK                                                                               | + | CD8 | 1 |         |
| 102-119 | GKWM <u>R</u> ELVLYDKEE <u>I</u> IRRI                                                                     | GKWV <u>R</u> ELI <u>L</u> YDKEE <u>I</u> IRRI                                                            | - | CD4 | 1 |         |
| 102-119 | GKWM <u>R</u> ELVLYDKEE <u>I</u> IRRI                                                                     | GKWV <u>R</u> ELI <u>L</u> YDKEE <u>I</u> IRRI                                                            | + | CD4 | 2 | (6)     |
| 170-186 | STLP <u>R</u> RS <u>G</u> AAGAAV <u>K</u> G <u>I</u>                                                      | STLP <u>R</u> RS <u>G</u> AAGAAV <u>K</u> G <u>V</u>                                                      | + | CD8 | 2 | (9)     |
| 177-194 | GAAGAAV <u>K</u> G <u>I</u> GT <u>M</u> MELI                                                              | GAAGAAV <u>K</u> G <u>V</u> GT <u>M</u> MELI                                                              | - | .   | 1 |         |
| 192-208 | <u>E</u> L <u>I</u> R <u>M</u> V <u>K</u> R <u>G</u> I <u>N</u> D <u>R</u> N <u>F</u> W <u>R</u>          | <u>E</u> L <u>I</u> R <u>M</u> I <u>K</u> R <u>G</u> I <u>N</u> D <u>R</u> N <u>F</u> W <u>R</u>          | + | CD4 | 1 | (6)     |
| 192-208 | <u>E</u> L <u>I</u> R <u>M</u> V <u>K</u> R <u>G</u> I <u>N</u> D <u>R</u> N <u>F</u> W <u>R</u>          | <u>E</u> L <u>I</u> R <u>M</u> I <u>K</u> R <u>G</u> I <u>N</u> D <u>R</u> N <u>F</u> W <u>R</u>          | - | .   | 1 |         |
| 213-230 | <u>R</u> <u>K</u> <u>T</u> R <u>S</u> A <u>Y</u> E <u>R</u> M <u>C</u> N <u>I</u> L <u>K</u> G <u>K</u> F | <u>R</u> <u>R</u> <u>T</u> R <u>I</u> A <u>Y</u> E <u>R</u> M <u>C</u> N <u>I</u> L <u>K</u> G <u>K</u> F | - | .   | 2 | (11)    |
| 213-230 | <u>R</u> <u>K</u> <u>T</u> R <u>S</u> A <u>Y</u> E <u>R</u> M <u>C</u> N <u>I</u> L <u>K</u> G <u>K</u> F | <u>R</u> <u>R</u> <u>T</u> R <u>I</u> A <u>Y</u> E <u>R</u> M <u>C</u> N <u>I</u> L <u>K</u> G <u>K</u> F | + | CD4 | 3 | (11)    |
| 221-238 | RMCN <u>I</u> L <u>K</u> G <u>K</u> FQTA <u>A</u> Q <u>R</u> A <u>M</u>                                   | <i>identical to H3N2</i>                                                                                  | + | CD4 | 2 |         |
| 229-246 | KFQTAAQR <u>A</u> M <u>V</u> DQVRESR                                                                      | KFQTAAQR <u>A</u> M <u>M</u> DQVRESR                                                                      | - | CD4 | 1 |         |
| 229-246 | KFQTAAQR <u>A</u> M <u>V</u> DQVRESR                                                                      | KFQTAAQR <u>A</u> M <u>M</u> DQVRESR                                                                      | + | CD4 | 2 |         |
| 237-253 | AM <u>V</u> DQVRESRNP <u>G</u> NAEI                                                                       | AM <u>M</u> DQVRESRNP <u>G</u> NAEI                                                                       | - | .   | 1 |         |
| 258-273 | FLARSAL <u>I</u> L <u>R</u> G <u>S</u> VA <u>H</u> K                                                      | <i>identical to H3N2</i>                                                                                  | + | CD8 | 3 | (10)    |
| 264-281 | L <u>I</u> L <u>R</u> G <u>S</u> VA <u>H</u> K <u>S</u> CLP <u>A</u> C <u>A</u> Y                         | L <u>I</u> L <u>R</u> G <u>S</u> VA <u>H</u> K <u>S</u> CLP <u>A</u> C <u>V</u> Y                         | + | CD4 | 1 | (6, 10) |
| 307-324 | LQNSQ <u>I</u> Y <u>S</u> L <u>I</u> R <u>P</u> N <u>E</u> N <u>P</u> A <u>H</u>                          | LQNSQ <u>V</u> F <u>S</u> L <u>I</u> R <u>P</u> N <u>E</u> N <u>P</u> A <u>H</u>                          | - | .   | 2 |         |
| 315-332 | L <u>I</u> R <u>P</u> N <u>E</u> N <u>P</u> A <u>H</u> K <u>S</u> Q <u>L</u> V <u>W</u> M <u>A</u>        | <i>identical to H3N2</i>                                                                                  | + | .   | 1 | (6)     |
| 329-346 | VWMACHSAA <u>F</u> E <u>D</u> L <u>R</u> L <u>L</u> S <u>F</u>                                            | VWMACHSAA <u>F</u> E <u>D</u> L <u>R</u> V <u>S</u> S <u>F</u>                                            | + | CD8 | 1 | (12)    |
| 329-346 | VWMACHSAA <u>F</u> E <u>D</u> L <u>R</u> L <u>L</u> S <u>F</u>                                            | VWMACHSAA <u>F</u> E <u>D</u> L <u>R</u> V <u>S</u> S <u>F</u>                                            | - | CD8 | 1 | (12)    |
| 337-353 | <u>A</u> F <u>E</u> D <u>L</u> R <u>L</u> L <u>S</u> F <u>I</u> R <u>G</u> T <u>K</u> V <u>S</u>          | <u>A</u> F <u>E</u> D <u>L</u> R <u>V</u> S <u>S</u> F <u>I</u> R <u>G</u> T <u>R</u> V <u>V</u>          | - | CD8 | 1 | (12)    |
| 356-373 | <u>G</u> <u>K</u> L <u>S</u> T <u>R</u> G <u>V</u> Q <u>I</u> A <u>S</u> N <u>E</u> N <u>M</u> D <u>N</u> | <u>G</u> Q <u>L</u> S <u>T</u> R <u>G</u> V <u>Q</u> I <u>A</u> S <u>N</u> E <u>N</u> M <u>E</u> A        | - | .   | 1 | (13)    |
| 378-395 | T <u>L</u> E <u>L</u> R <u>S</u> G <u>Y</u> W <u>A</u> I <u>R</u> T <u>R</u> S <u>G</u> G <u>N</u>        | T <u>L</u> E <u>L</u> R <u>S</u> <u>R</u> Y <u>W</u> A <u>I</u> R <u>T</u> R <u>S</u> G <u>G</u> N        | - | .   | 1 | (14)    |
| 386-403 | W <u>A</u> I <u>R</u> T <u>R</u> S <u>G</u> G <u>N</u> T <u>N</u> Q <u>Q</u> R <u>A</u> S <u>A</u>        | <i>identical to H3N2</i>                                                                                  | + | CD4 | 1 |         |
| 394-408 | G <u>N</u> T <u>N</u> Q <u>Q</u> R <u>A</u> S <u>A</u> G <u>Q</u> <u>T</u> S <u>V</u>                     | G <u>N</u> T <u>N</u> Q <u>Q</u> R <u>A</u> S <u>A</u> G <u>Q</u> <u>I</u> S <u>V</u>                     | + | .   | 1 |         |
| 397-414 | N <u>Q</u> Q <u>R</u> A <u>S</u> A <u>G</u> Q <u>T</u> S <u>V</u> Q <u>P</u> T <u>F</u> S <u>V</u>        | N <u>Q</u> Q <u>R</u> A <u>S</u> A <u>G</u> Q <u>I</u> S <u>V</u> Q <u>P</u> T <u>F</u> S <u>V</u>        | + | .   | 1 |         |
| 404-420 | G <u>Q</u> <u>T</u> S <u>V</u> Q <u>P</u> T <u>F</u> S <u>V</u> Q <u>R</u> N <u>L</u> P <u>F</u>          | <u>G</u> Q <u>I</u> S <u>V</u> Q <u>P</u> T <u>F</u> S <u>V</u> Q <u>R</u> N <u>L</u> P <u>F</u>          | + | CD4 | 2 | (6)     |
| 411-428 | T <u>F</u> S <u>V</u> Q <u>R</u> N <u>L</u> P <u>F</u> E <u>K</u> S <u>T</u> I <u>M</u> A <u>A</u>        | T <u>F</u> S <u>V</u> Q <u>R</u> N <u>L</u> P <u>F</u> E <u>R</u> A <u>T</u> I <u>M</u> A <u>A</u>        | - | .   | 2 | (15)    |
| 419-436 | P <u>F</u> E <u>K</u> S <u>T</u> I <u>M</u> A <u>A</u> F <u>T</u> G <u>N</u> T <u>E</u> G <u>R</u>        | P <u>F</u> E <u>R</u> A <u>T</u> I <u>M</u> A <u>A</u> F <u>T</u> G <u>N</u> T <u>E</u> G <u>R</u>        | - | .   | 1 |         |

|            |         |                            |                                  |   |     |   |      |
|------------|---------|----------------------------|----------------------------------|---|-----|---|------|
|            | 427-444 | AAFTGNTEGRTSDMRAEI         | AAFTGNTEGRTSDMRTEI               | + | .   | 1 |      |
|            | 443-458 | EIIRMMEGAKPEEVSF           | <b>EIIRMME</b> SAR <b>PEDVSF</b> | + | .   | 1 | (6)  |
|            | 449-466 | EGAKPEEVSFRGRGVFEL         | ESAR <b>PEDVSF</b> QGRGVFEL      | - | .   | 1 |      |
|            | 457-471 | SFRGRGVFELSDEKA            | <b>SFQGRGVFELSDEKA</b>           | - | CD4 | 3 | (11) |
|            | 470-487 | KATNPVPSFDMSNEGSY          | KATNPVPSFDMNNEGSY                | + | .   | 1 |      |
|            | 470-487 | KATNPVPSFDMSNEGSY          | KATNPVPSFDMNNEGSY                | - | .   | 1 |      |
|            | 478-493 | <b>SFDMSNEGSYFFGDNA</b>    | SFDMNNEGSYFFGDNA                 | - | CD4 | 1 | (11) |
| <b>NS1</b> | 6-23    | VSSFQVDCFLWHIRKQVV         | VSSFQVDCFLWHVRKRFA               | - | .   | 2 |      |
|            | 14-30   | FLWHIRKQVVDQELSDA          | FLWHVRKR <b>FADQEL</b> GDA       | - | .   | 1 |      |
|            | 60-77   | VGKQIVEKILKEESDEAL         | AGKQIVERIL <b>EEESD</b> KAL      | + | .   | 2 |      |
|            | 68-85   | ILKEESDEALKMTMVSTP         | ILEEESDKALKMPASRYL               | - | .   | 1 |      |
|            | 68-85   | ILKEESDEALKMTMVSTP         | ILEEESDKALKMPASRYL               | + | CD4 | 1 |      |
|            | 76-92   | STPASRYITDMTIEELSR         | ALKMPASRYLTDMTLEEM               | + | CD4 | 1 |      |
|            | 154-169 | GAIVGEISPLPSFPGH           | GAIV <b>GEISPLSL</b> PGH         | - | .   | 1 | (12) |
| <b>NS2</b> | 6-19    | VSSFQDILLRMSKM             | VSSFQDILVRMSKM                   | - | .   | 1 |      |
|            | 31-45   | MITQFESLKIYRDSL            | MITQFESLKL <b>YR</b> DSL         | + | CD4 | 3 |      |
| <b>PA</b>  | 441-458 | MRRNYFTAEVSHCRATEY         | <i>identical to H3N2</i>         | + | CD8 | 1 |      |
| <b>PB1</b> | 21-38   | TFPYTGDPYPYSHGTGTGY        | <i>identical to H3N2</i>         | + | CD8 | 2 |      |
|            | 43-60   | VNRTHQYSEKKGWTTNTE         | <i>identical to H3N2</i>         | + | .   | 1 |      |
|            | 57-73   | TNETGAPQLNPIDGPL           | <i>identical to H3N2</i>         | + | .   | 1 |      |
|            | 64-82   | PQLNPIDGPLPEDNEPSGY        | <i>identical to H3N2</i>         | + | .   | 1 |      |
|            | 86-103  | DCVLEAMAFLEESHGIF          | <i>identical to H3N2</i>         | + | .   | 1 |      |
|            | 102-119 | IFENSCLTMEVVQQTRV          | IFENSCLTMEIVQQTRV                | - | .   | 1 |      |
|            | 123-140 | TQGRQTYDWTLNRNQPAA         | <i>identical to H3N2</i>         | + | .   | 1 |      |
|            | 270-287 | GLPVGGNEKKAKLANVVR         | <i>identical to H3N2</i>         | + | .   | 1 |      |
|            | 316-333 | MFLAMITYITKNQPEWF          | RMFLAMITYITRNQPEWF               | + | .   | 1 |      |
|            | 402-419 | SLSPGMMGMFNMLSTVL          | <i>identical to H3N2</i>         | + | CD4 | 1 |      |
|            | 410-426 | GMF <b>NMLSTVLGVS</b> ILNL | <i>identical to H3N2</i>         | + | .   | 1 | (2)  |
|            | 417-433 | TVLGVSILNLGQKKYTK          | TVLGVSILNLGQKKYTK                | - | .   | 1 |      |
|            | 417-433 | TVLGVSILNLGQKKYTK          | TVLGVSILNLGQKKYTK                | + | CD4 | 1 |      |
|            | 432-449 | TKTTYWWDGLQSSDDFAL         | <i>identical to H3N2</i>         | + | CD4 | 1 |      |
|            | 470-486 | CKLVGINMSKKKSYINK          | CKLVGINMSKKKSYINR                | + | .   | 1 |      |
|            | 498-514 | RYGFVANFSMELPSFGV          | <i>identical to H3N2</i>         | + | CD8 | 1 |      |
|            | 505-521 | FSMELPSFGVSGINESA          | <i>identical to H3N2</i>         | + | .   | 1 |      |
|            | 562-579 | HRGDTQIQTRRSFELKKL         | <i>identical to H3N2</i>         | + | .   | 1 |      |

|            |         |                             |                             |   |     |   |
|------------|---------|-----------------------------|-----------------------------|---|-----|---|
|            | 570-587 | <u>TRRSFELKKLWDQTSRA</u>    | <u>TRRSFELKKLWEQTRSKA</u>   | - | .   | 1 |
|            | 705-722 | <u>YRRPIGISSMVEAMVSRA</u>   | <u>YRRPVGISSMVEAMVSRA</u>   | + | CD8 | 1 |
|            | 705-722 | <u>YRRPIGISSMVEAMVSRA</u>   | <u>YRRPVGISSMVEAMVSRA</u>   | - | CD8 | 1 |
| <b>PB2</b> | 61-78   | <u>KRITEMVPERNEQGQTLW</u>   | <u>KRIIEMIPERNEQGQTLW</u>   | - | .   | 1 |
|            | 205-221 | YMLERELVRKTRFLPVA           | <i>identical to H3N2</i>    | + | CD8 | 1 |
|            | 212-229 | <u>VRKTRFLPVAGGTSSIYI</u>   | <u>VRKTRFLPVAGGTSSVYI</u>   | + | CD8 | 1 |
|            | 212-229 | <u>VRKTRFLPVAGGTSSIYI</u>   | <u>VRKTRFLPVAGGTSSVYI</u>   | - | .   | 1 |
|            | 419-436 | <u>NFVNRRANQRNLNPMHQLLR</u> | <u>NFVNRRANQRNLNPMHQLLR</u> | - | .   | 1 |
|            | 544-561 | <u>SVLVNTYQWIIRNWEAVK</u>   | <u>SVLVNTYQWIIRNWEIVK</u>   | + | CD4 | 1 |
|            | 590-607 | <u>SQYSGFVRTLFQQMRDVL</u>   | <u>GQYSGFVRTLFQQMRDVL</u>   | - | .   | 1 |
|            | 598-615 | <u>TLFQQMRDVLGTFDTQI</u>    | <u>TLFQQMRDVLGTFDTVQI</u>   | + | .   | 1 |
|            | 683-699 | <u>TSGVESAVLRGFLIIGK</u>    | <u>TAGVESAVLRGFLIIGK</u>    | - | .   | 1 |

<sup>A</sup> Strains used: A/Vietnam/CL26/2004 (H5N1), A/New York 388/2005 (H3N2) (HA and NA), and A/New York 232/2004 (H3N2) (internal proteins).

H5N1 and H3N2 amino acid sequence variations are underlined.

<sup>B</sup> Recognition of H5N1 peptides.

<sup>C</sup> After depletion, most subdominant responses (< 40 SFU/million PBMCs) were detectable in neither CD4+ nor CD8+ T-cell depleted populations and therefore were excluded from the subsequent analysis of influenza-specific CD4+ and CD8+ T-cell distribution;

. , undetermined.

<sup>D</sup> Number of participants recognizing corresponding peptides.

<sup>E</sup> References for previously identified epitopes (sequences highlighted in bold).



## REFERENCES

1. Gelder, C.M., Welsh, K.I., Faith, A., Lamb, J.R., and Askonas, B.A. 1995. Human CD4+ T-cell repertoire of responses to influenza A virus hemagglutinin after recent natural infection. *J Virol* 69:7497-7506.
2. Gianfrani, C., Oseroff, C., Sidney, J., Chesnut, R.W., and Sette, A. 2000. Human memory CTL response specific for influenza A virus is broad and multispecific. *Hum Immunol* 61:438-452.
3. Trojan, A., Urosevic, M., Hummerjohann, J., Giger, R., Schanz, U., and Stahel, R.A. 2003. Immune reactivity against a novel HLA-A3-restricted influenza virus peptide identified by predictive algorithms and interferon-gamma quantitative PCR. *J Immunother* 26:41-46.
4. Linnemann, T., Jung, G., and Walden, P. 2000. Detection and quantification of CD4(+) T cells with specificity for a new major histocompatibility complex class II-restricted influenza A virus matrix protein epitope in peripheral blood of influenza patients. *J Virol* 74:8740-8743.
5. Gotch, F., Rothbard, J., Howland, K., Townsend, A., and McMichael, A. 1987. Cytotoxic T lymphocytes recognize a fragment of influenza virus matrix protein in association with HLA-A2. *Nature* 326:881-882.
6. Roti, M., Yang, J., Berger, D., Huston, L., James, E.A., and Kwok, W.W. 2008. Healthy Human Subjects Have CD4+ T Cells Directed against H5N1 Influenza Virus. *J Immunol* 180:1758-1768.
7. Dong, T., Boyd, D., Rosenberg, W., Alp, N., Takiguchi, M., McMichael, A., and Rowland-Jones, S. 1996. An HLA-B35-restricted epitope modified at an anchor residue results in an antagonist peptide. *Eur J Immunol* 26:335-339.
8. Adler, S., Reay, P., Roy, P., and Klenk, H.D. 1998. Induction of T cell response by bluetongue virus core-like particles expressing a T cell epitope of the M1 protein of influenza A virus. *Med Microbiol Immunol (Berl)* 187:91-96.
9. Jameson, J., Cruz, J., and Ennis, F.A. 1998. Human cytotoxic T-lymphocyte repertoire to influenza A viruses. *J Virol* 72:8682-8689.

10. DiBrino, M., Tsuchida, T., Turner, R.V., Parker, K.C., Coligan, J.E., and Biddison, W.E. 1993. HLA-A1 and HLA-A3 T cell epitopes derived from influenza virus proteins predicted from peptide binding motifs. *J Immunol* 151:5930-5935.
11. Brett, S.J., Blau, J., Hughes-Jenkins, C.M., Rhodes, J., Liew, F.Y., and Tite, J.P. 1991. Human T cell recognition of influenza A nucleoprotein. Specificity and genetic restriction of immunodominant T helper cell epitopes. *J Immunol* 147:984-991.
12. DiBrino, M., Parker, K.C., Margulies, D.H., Shiloach, J., Turner, R.V., Biddison, W.E., and Coligan, J.E. 1995. Identification of the peptide binding motif for HLA-B44, one of the most common HLA-B alleles in the Caucasian population. *Biochemistry* 34:10130-10138.
13. Townsend, A.R., Rothbard, J., Gotch, F.M., Bahadur, G., Wraith, D., and McMichael, A.J. 1986. The epitopes of influenza nucleoprotein recognized by cytotoxic T lymphocytes can be defined with short synthetic peptides. *Cell* 44:959-968.
14. Papagno, L., Appay, V., Sutton, J., Rostron, T., Gillespie, G.M., Ogg, G.S., King, A., Makadzanhge, A.T., Waters, A., Balotta, C., et al. 2002. Comparison between HIV- and CMV-specific T cell responses in long-term HIV infected donors. *Clin Exp Immunol* 130:509-517.
15. Boon, A.C., de Mutsert, G., Graus, Y.M., Fouchier, R.A., Sintnicolaas, K., Osterhaus, A.D., and Rimmelzwaan, G.F. 2002. Sequence variation in a newly identified HLA-B35-restricted epitope in the influenza A virus nucleoprotein associated with escape from cytotoxic T lymphocytes. *J Virol* 76:2567-2572.

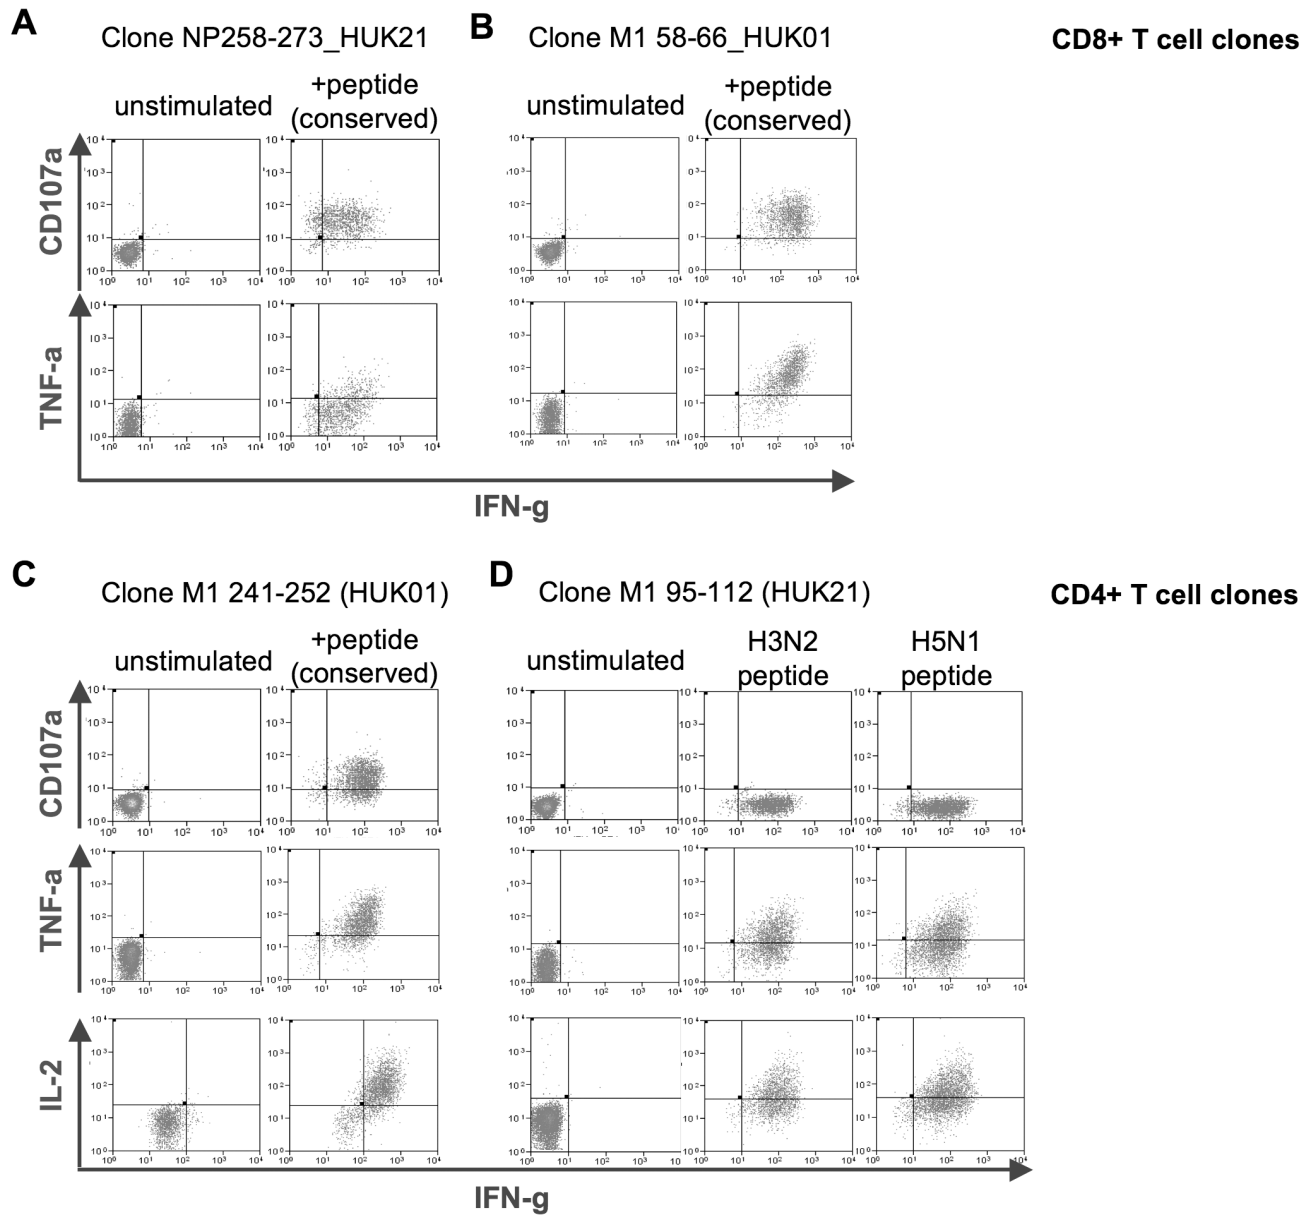

### Supplementary Figure 2.

Polyfunctional capacities displayed by the H5N1 cross-reactive CD8+ (A, B) and CD4+ (C, D) T-cell clones derived from healthy individuals. Representative examples.
